# Supplementary material
Source: publisher site journal article supplement (https://www.spandidos-publications.com/3154/downloadSupplementary)
Supplement: Supplementary file 1 [file downloadSupplementary]

Table SI. Sequence for qPCR primers.<sup>a</sup>

| Primer  | Forward                | Reverse                 |
|---------|------------------------|-------------------------|
| SLC4A4  | GGAAAGCCAAGTCCTACCACGA | TACCAGCAATCAGGTCGTGCCT  |
| SLC4A5  | CATCTACCTCGGCTGTATCACC | GAAGAGGCAGAACAAGGAGCCA  |
| SLC4A7  | CCAGTCGGATTCTTGTTCG    | CAGACCTGTTCGCAAAGAGTGG  |
| SLC4A8  | CATCGTGACAGCAGAAGTCCAC | GCTTGAGAGGATGAAGGTGGTG  |
| SLC4A10 | TCAGTCTGCTCCAGCCTGTGTT | GATGCTTCAGCACCTGGAGGAA  |
| ACTB    | CACCATTGGCAATGAGCGGTTC | AGGTCTTTGCGGATGTCCACGT  |
| 18SN5   | ACCCGTTGAACCCCATTCGTGA | GCCTCACTAAACCATCCAATCGG |

<sup>a</sup>All sequences are in 5'→3' direction.

Table SII. Sequence for siRNA duplex.<sup>a</sup>

| siRNA duplex        | Sequence                                                                                                            |
|---------------------|---------------------------------------------------------------------------------------------------------------------|
| SLC4A4A             | rGrCrArCrUrGrUrUrUrUrCcCcUrUrGrArUrArArArGrUCA                                                                      |
| SLC4A4B             | rArUrGrUrUrUrArCrCrArArCrCrCrUrGrArUrArArUrGrGTA                                                                    |
| SLC4A4C             | rGrArUrUrUrUrCrArUrGrGrArCrCrArArCrArArUrUrACA                                                                      |
| Control (scrambled) | Sense:rCrGrUrUrArArUrCrGrCrGrUrArUrArArUrArCrGrCrGrUA<br>Anti:ArUrArCrGrCrGrUrArUrUrArUrArCrGrCrGrArUrUrArArCrGrArC |

<sup>a</sup>All sequences are in 5'→3' direction.
